# Supplementary material for: Impact of consuming a Mediterranean-style diet during pregnancy on neurodevelopmental disabilities in offspring: results from the Boston Birth Cohort
Source: PubMed Central journal article supplement — Precis Nutr. 2023 Jul 11;2(3):e00047. doi: 10.1097/PN9.0000000000000047 (PMC10513021; doi:10.1097/pn9.0000000000000047), 2023-07-11
Supplement: pn9-2-e00047-s001.pdf [file pn9-2-e00047-s001.pdf]

## Supplemental Material

### Impact of consuming a Mediterranean-style diet during pregnancy on neurodevelopmental disabilities in offspring: results from the Boston Birth Cohort

Xiaoyu Che, Susan M. Gross, Guoying Wang, Xiumei Hong, Colleen Pearson, Tami Bartell, Xiaobin Wang

#### Table of Contents

|                                                                                                                                                                                                                        |    |
|------------------------------------------------------------------------------------------------------------------------------------------------------------------------------------------------------------------------|----|
| Table S1. Reformatted food frequency questionnaire for use in the Boston Birth Cohort. ....                                                                                                                            | 2  |
| Table S2. Frequency of intake of food groups of mothers in a subset of the Boston Birth Cohort, stratified by Mediterranean-style diet score (MSDS) quintiles.....                                                     | 3  |
| Table S3. Characteristics of TD children and children with NDD, Autism, ADHD, and other DD.....                                                                                                                        | 5  |
| Table S4. Adjusted associations of maternal Mediterranean-style diet score (MSDS) with offspring Autism, ADHD, and other DD among women with OWO/DM. ....                                                              | 8  |
| Table S5. Adjusted associations of maternal Mediterranean-style diet score (MSDS) with offspring Autism, ADHD, and other DD among women without OWO or DM.....                                                         | 10 |
| Table S6. Unadjusted and adjusted associations of maternal MSDS with NDD, Autism, ADHD, and other DD in offspring. <sup>a</sup> .....                                                                                  | 10 |
| Table S7. Adjusted associations between maternal MSDS and NDD in offspring stratified by maternal smoking during pregnancy. <sup>b</sup> .....                                                                         | 14 |
| Table S8. Adjusted associations between maternal MSDS and NDD in offspring stratified by preterm birth (PTB).....                                                                                                      | 16 |
| Table S9. Adjusted associations between maternal MSDS and NDD in offspring stratified by low birthweight (LBW).....                                                                                                    | 18 |
| Table S10. Interaction effects of MSDS and maternal age on Autism and other DD. ....                                                                                                                                   | 20 |
| Figure S1. The distribution of maternal Mediterranean-style diet scores (MSDSs). ....                                                                                                                                  | 21 |
| Figure S2. A scatter plot of correlation between maternal MSDSs versus maternal plasma folate levels (A), and a scatter plot of correlation between maternal MSDSs versus maternal plasma vitamin B12 levels (B). .... | 22 |

**Table S1.** Reformatted food frequency questionnaire for use in the Boston Birth Cohort.

| Question: During this pregnancy, on average, how often did you eat or drink the following foods per week? |                          |                          |                          |                          |                          |                          |
|-----------------------------------------------------------------------------------------------------------|--------------------------|--------------------------|--------------------------|--------------------------|--------------------------|--------------------------|
| Food Groups                                                                                               | Weekly intake frequency  |                          |                          |                          |                          |                          |
|                                                                                                           | None                     | <1 day                   | 1-2 days                 | 3-5 days                 | 6-7 days                 | Don't know               |
| Green vegetables                                                                                          | <input type="checkbox"/> |
| Orange vegetables (Carrots, Squash, etc..)                                                                | <input type="checkbox"/> |
| Fruits                                                                                                    | <input type="checkbox"/> |
| Meats                                                                                                     | <input type="checkbox"/> |
| Shellfish                                                                                                 | <input type="checkbox"/> |
| Fish                                                                                                      | <input type="checkbox"/> |
| Hen's Egg                                                                                                 | <input type="checkbox"/> |
| Cow's milk / Dairy products /Cheese)                                                                      | <input type="checkbox"/> |
| Beans                                                                                                     | <input type="checkbox"/> |
| Rice                                                                                                      | <input type="checkbox"/> |
| Wheat (Pasta, Bread, Cereal)                                                                              | <input type="checkbox"/> |
| Soy / Tofu                                                                                                | <input type="checkbox"/> |
| Seeds (Sesame, Sunflower, Pumpkin)                                                                        | <input type="checkbox"/> |
| Calcium-fortified juice                                                                                   | <input type="checkbox"/> |
| Peanuts                                                                                                   | <input type="checkbox"/> |
| Tree nuts                                                                                                 | <input type="checkbox"/> |

**Table S2.** Frequency of intake of food groups among mothers in a subset of the Boston Birth Cohort, stratified by Mediterranean-style diet score (MSDS) quintiles

| Reported weekly food intake frequency | MSDS quintiles |           |           |           |           |
|---------------------------------------|----------------|-----------|-----------|-----------|-----------|
|                                       | Quintile1      | Quintile2 | Quintile3 | Quintile4 | Quintile5 |
| <b>Green vegetables</b>               |                |           |           |           |           |
| None                                  | 60(9.4)        | 18(2.4)   | 8(1.1)    | 15(2.8)   | 1(0.2)    |
| <1 day                                | 92(14.4)       | 56(7.4)   | 24(3.4)   | 10(1.9)   | 3(0.6)    |
| 1-2 days                              | 257(40.3)      | 259(34.1) | 172(24.7) | 96(18.1)  | 45(8.5)   |
| 3-5 days                              | 193(30.3)      | 338(44.5) | 379(54.5) | 283(53.5) | 193(36.3) |
| 6-7 days                              | 33(5.2)        | 83(10.9)  | 111(15.9) | 123(23.3) | 289(54.4) |
| Unknown/Missing                       | 2(0.3)         | 6(0.8)    | 2(0.3)    | 2(0.4)    | 0(0.0)    |
| <b>Orange vegetables #</b>            |                |           |           |           |           |
| None                                  | 152(23.9)      | 57(7.5)   | 33(4.7)   | 23(4.3)   | 7(1.3)    |
| <1 day                                | 206(32.3)      | 156(20.5) | 85(12.2)  | 27(5.1)   | 25(4.7)   |
| 1-2 days                              | 192(30.1)      | 305(40.1) | 243(34.9) | 148(28.0) | 75(14.1)  |
| 3-5 days                              | 73(11.5)       | 204(26.8) | 291(41.8) | 260(49.1) | 195(36.7) |
| 6-7 days                              | 10(1.6)        | 32(4.2)   | 42(6.0)   | 69(13.0)  | 228(42.9) |
| Unknown/Missing                       | 4(0.6)         | 6(0.8)    | 2(0.3)    | 2(0.4)    | 1(0.2)    |
| <b>Fruits</b>                         |                |           |           |           |           |
| None                                  | 19(3.0)        | 7(0.9)    | 10(1.4)   | 16(3.0)   | 2(0.4)    |
| <1 day                                | 30(4.7)        | 22(2.9)   | 6(0.9)    | 2(0.4)    | 0(0.0)    |
| 1-2 days                              | 156(24.5)      | 128(16.8) | 80(11.5)  | 32(6.0)   | 15(2.8)   |
| 3-5 days                              | 275(43.2)      | 346(45.5) | 330(47.4) | 203(38.4) | 104(19.6) |
| 6-7 days                              | 157(24.6)      | 253(33.3) | 268(38.5) | 270(51.0) | 405(76.3) |
| Unknown/Missing                       | 0(0.0)         | 4(0.5)    | 2(0.3)    | 6(1.1)    | 5(0.9)    |
| <b>Meat</b>                           |                |           |           |           |           |
| None                                  | 8(1.3)         | 19(2.5)   | 17(2.4)   | 18(3.4)   | 34(6.4)   |
| <1 day                                | 26(4.1)        | 17(2.2)   | 32(4.6)   | 23(4.3)   | 36(6.8)   |
| 1-2 days                              | 74(11.6)       | 124(16.3) | 144(20.7) | 103(19.5) | 96(18.1)  |
| 3-5 days                              | 294(46.2)      | 341(44.9) | 279(40.1) | 176(33.3) | 160(30.1) |
| 6-7 days                              | 235(36.9)      | 258(33.9) | 223(32.0) | 205(38.8) | 205(38.6) |
| Unknown/Missing                       | 0(0.0)         | 1(0.1)    | 1(0.1)    | 4(0.8)    | 0(0.0)    |
| <b>Fish</b>                           |                |           |           |           |           |
| None                                  | 245(38.5)      | 169(22.2) | 106(15.2) | 61(11.5)  | 42(7.9)   |
| <1 day                                | 202(31.7)      | 259(34.1) | 205(29.5) | 122(23.1) | 91(17.1)  |
| 1-2 days                              | 162(25.4)      | 270(35.5) | 304(43.7) | 250(47.3) | 223(42.0) |
| 3-5 days                              | 23(3.6)        | 55(7.2)   | 70(10.1)  | 86(16.3)  | 133(25.0) |
| 6-7 days                              | 4(0.6)         | 6(0.8)    | 9(1.3)    | 7(1.3)    | 41(7.7)   |
| Unknown/Missing                       | 1(0.2)         | 1(0.1)    | 2(0.3)    | 3(0.6)    | 1(0.2)    |
| <b>Hen's Egg</b>                      |                |           |           |           |           |
| None                                  | 106(16.6)      | 46(6.1)   | 34(4.9)   | 25(4.7)   | 10(1.9)   |
| <1 day                                | 98(15.4)       | 109(14.3) | 77(11.1)  | 35(6.6)   | 24(4.5)   |
| 1-2 days                              | 305(47.9)      | 337(44.3) | 275(39.5) | 171(32.3) | 129(24.3) |

|                 |           |           |           |           |           |
|-----------------|-----------|-----------|-----------|-----------|-----------|
| 3-5 days        | 96(15.1)  | 205(27.0) | 230(33.0) | 209(39.5) | 188(35.4) |
| 6-7 days        | 32(5.0)   | 60(7.9)   | 77(11.1)  | 86(16.3)  | 179(33.7) |
| Unknown/Missing | 0(0.0)    | 3(0.4)    | 3(0.4)    | 3(0.6)    | 1(0.2)    |
| <b>Beans</b>    |           |           |           |           |           |
| None            | 169(26.5) | 77(10.1)  | 34(4.9)   | 38(7.2)   | 25(4.7)   |
| <1 day          | 102(16.0) | 70(9.2)   | 38(5.5)   | 20(3.8)   | 10(1.9)   |
| 1-2 days        | 158(24.8) | 245(32.2) | 174(25)   | 91(17.2)  | 69(13.0)  |
| 3-5 days        | 173(27.2) | 292(38.4) | 336(48.3) | 234(44.2) | 157(29.6) |
| 6-7 days        | 31(4.9)   | 61(8.0)   | 97(13.9)  | 126(23.8) | 258(48.6) |
| Known/Missing   | 4(0.6)    | 15(2.0)   | 17(2.4)   | 20(3.8)   | 12(2.3)   |
| <b>Rice</b>     |           |           |           |           |           |
| None            | 45(7.1)   | 22(2.9)   | 28(4.0)   | 32(6.0)   | 22(4.1)   |
| <1 day          | 47(7.4)   | 35(4.6)   | 16(2.3)   | 7(1.3)    | 3(0.6)    |
| 1-2 days        | 216(33.9) | 195(25.7) | 111(15.9) | 53(10.0)  | 35(6.6)   |
| 3-5 days        | 241(37.8) | 357(47.0) | 359(51.6) | 229(43.3) | 140(26.4) |
| 6-7 days        | 84(13.2)  | 137(18.0) | 165(23.7) | 189(35.7) | 319(60.1) |
| Unknown/Missing | 4(0.6)    | 14(1.8)   | 17(2.4)   | 19(3.6)   | 12(2.3)   |
| <b>Dairy *</b>  |           |           |           |           |           |
| None            | 69(10.8)  | 43(5.7)   | 24(3.4)   | 30(5.7)   | 24(4.5)   |
| <1 day          | 39(6.1)   | 25(3.3)   | 18(2.6)   | 11(2.1)   | 3(0.6)    |
| 1-2 days        | 113(17.7) | 82(10.8)  | 38(5.5)   | 17(3.2)   | 20(3.8)   |
| 3-5 days        | 204(32.0) | 272(35.8) | 283(40.7) | 146(27.6) | 69(13.0)  |
| 6-7 days        | 208(32.7) | 324(42.6) | 315(45.3) | 306(57.8) | 404(76.1) |
| Unknown/Missing | 4(0.6)    | 14(1.8)   | 18(2.6)   | 19(3.6)   | 11(2.1)   |
| <b>Wheat ¶</b>  |           |           |           |           |           |
| None            | 143(22.4) | 74(9.7)   | 36(5.2)   | 38(7.2)   | 23(4.3)   |
| <1 day          | 62(9.7)   | 33(4.3)   | 10(1.4)   | 14(2.6)   | 5(0.9)    |
| 1-2 days        | 146(22.9) | 151(19.9) | 106(15.2) | 47(8.9)   | 29(5.5)   |
| 3-5 days        | 171(26.8) | 292(38.4) | 319(45.8) | 208(39.3) | 138(26.0) |
| 6-7 days        | 111(17.4) | 196(25.8) | 207(29.7) | 203(38.4) | 322(60.6) |
| Unknown/Missing | 4(0.6)    | 14(1.8)   | 18(2.6)   | 19(3.6)   | 14(2.6)   |

#: Orange vegetables include carrots, squash, etc.

\*: Dairy foods include cow's milk, dairy products, and cheese.

¶: Wheat includes pasta, bread, and cereals.

**Table S3.** Characteristics of TD children and children with NDD, Autism, ADHD, and other DD.

| <b>Characteristics</b>     | Total      | TD         | NDD        | Autism    | ADHD      | other DD  | NDD vs.<br>TD | Autism vs.<br>TD | ADHD vs.<br>TD | other DD vs.<br>TD |
|----------------------------|------------|------------|------------|-----------|-----------|-----------|---------------|------------------|----------------|--------------------|
| No.                        | 3153       | 1791(56.8) | 1362(43.2) | 123(3.9)  | 445(14.1) | 794(25.2) | <i>p</i>      | <i>p</i>         | <i>p</i>       | <i>p</i>           |
| <b>MSDS (continuous)</b>   | 25(22-27)  | 25(23-27)  | 25(22-27)  | 25(22-27) | 25(22-27) | 25(22-27) | 0.029         | 0.393            | 0.160          | 0.057              |
| <b>MSDS (categorical)</b>  |            |            |            |           |           |           | 0.063         | 0.776            | 0.156          | 0.238              |
| Quintile1                  | 637(20.2)  | 339(18.9)  | 298(21.9)  | 28(22.8)  | 93(20.9)  | 177(22.3) |               |                  |                |                    |
| Quintile2                  | 760(24.1)  | 424(23.7)  | 336(24.7)  | 31(25.2)  | 119(26.7) | 186(23.4) |               |                  |                |                    |
| Quintile3                  | 696(22.1)  | 415(23.2)  | 281(20.6)  | 25(20.3)  | 86(19.3)  | 170(21.4) |               |                  |                |                    |
| Quintile4                  | 529(16.8)  | 293(16.4)  | 236(17.3)  | 20(16.3)  | 80(18.0)  | 136(17.1) |               |                  |                |                    |
| Quintile5                  | 531(16.8)  | 320(17.9)  | 211(15.5)  | 19(15.4)  | 67(15.1)  | 125(15.7) |               |                  |                |                    |
| <b>Maternal age(years)</b> | 28(23-33)  | 28(23-33)  | 28(24-34)  | 30(25-34) | 27(22-33) | 29(24-34) | 0.088         | 0.002            | 0.058          | 0.006              |
| <b>Race and ethnicity</b>  |            |            |            |           |           |           | 0.014         | 0.231            | 0.089          | 0.047              |
| Non-Hispanic<br>Black *    | 1849(58.6) | 1016(56.7) | 833(61.2)  | 67(54.5)  | 274(61.6) | 492(62.0) |               |                  |                |                    |
| Non-Hispanic<br>White      | 229(7.3)   | 145(8.1)   | 84(6.2)    | 6(4.9)    | 31(7.0)   | 47(5.9)   |               |                  |                |                    |
| Hispanic                   | 702(22.3)  | 399(22.3)  | 303(22.2)  | 36(29.3)  | 100(22.5) | 167(21.0) |               |                  |                |                    |
| Other †                    | 373(11.8)  | 231(12.9)  | 142(10.4)  | 14(11.4)  | 40(9.0)   | 88(11.1)  |               |                  |                |                    |
| <b>Education</b>           |            |            |            |           |           |           | 0.192         | 0.319            | 0.007          | 0.721              |
| Less than HS               | 133(4.2)   | 82(4.6)    | 51(3.7)    | 5(4.1)    | 13(2.9)   | 33(4.2)   |               |                  |                |                    |
| HS or equivalent           | 1904(60.4) | 1059(59.1) | 845(62.0)  | 65(52.8)  | 298(67.0) | 482(60.7) |               |                  |                |                    |
| Greater than HS            | 1116(35.4) | 650(36.3)  | 466(34.2)  | 53(43.1)  | 134(30.1) | 279(35.1) |               |                  |                |                    |
| <b>Marriage status</b>     |            |            |            |           |           |           | 0.206         | 0.492            | <0.001         | 0.471              |
| Married                    | 1029(32.6) | 601(33.6)  | 428(31.4)  | 45(36.6)  | 105(23.6) | 278(35.0) |               |                  |                |                    |

|                          |            |            |            |           |           |           |        |                    |        |        |
|--------------------------|------------|------------|------------|-----------|-----------|-----------|--------|--------------------|--------|--------|
| Other                    | 2124(67.4) | 1190(66.4) | 934(68.6)  | 78(63.4)  | 340(76.4) | 516(75.0) |        |                    |        |        |
| <b>Pre-pregnancy BMI</b> |            |            |            |           |           |           | 0.001  | 0.050              | 0.040  | 0.009  |
| <25 kg/m2                | 1438(45.6) | 862(48.1)  | 576(42.3)  | 48(39.0)  | 190       | 338       |        |                    |        |        |
| >=25 kg/m2               | 1715(54.4) | 929(51.9)  | 786(57.7)  | 75(61.0)  | 255(57.3) | 456(57.4) |        |                    |        |        |
| <b>Parity</b>            |            |            |            |           |           |           | 0.933  | 0.454              | 0.988  | 0.699  |
| 0                        | 1350(42.8) | 768(42.9)  | 582(42.7)  | 57(46.3)  | 191(42.9) | 334(42.1) |        |                    |        |        |
| >0                       | 1803(57.2) | 1023(57.1) | 780(57.3)  | 66(53.7)  | 254(57.1) | 460(5.0)  |        |                    |        |        |
| <b>Diabetes</b>          |            |            |            |           |           |           | 0.059  | 0.013              | 0.362  | 0.189  |
| Yes                      | 344(10.9)  | 179(10.0)  | 165(12.1)  | 21(17.1)  | 51(11.5)  | 93(11.7)  |        |                    |        |        |
| No                       | 2809(89.1) | 1612(90.0) | 1197(87.9) | 102(82.9) | 394(88.5) | 701(88.3) |        |                    |        |        |
| <b>Preeclampsia</b>      |            |            |            |           |           |           | 0.119  | 0.739 <sup>#</sup> | 0.452  | 0.016  |
| Mild                     | 128(4.1)   | 64(3.6)    | 64(4.7)    | 5(4.1)    | 21(4.7)   | 38(4.8)   |        |                    |        |        |
| Severe                   | 225(7.1)   | 119(6.6)   | 106(7.8)   | 6(4.9)    | 26(5.8)   | 74(9.3)   |        |                    |        |        |
| No                       | 2800(88.8) | 1608(89.8) | 1192(87.5) | 112(91.1) | 398(89.4) | 682(85.9) |        |                    |        |        |
| <b>Ever smoke</b>        |            |            |            |           |           |           | <0.001 | 0.457              | <0.001 | 0.051  |
| Yes                      | 580(18.4)  | 289(16.1)  | 291(21.4)  | 23(18.7)  | 115(25.8) | 153(19.3) |        |                    |        |        |
| No                       | 2573(81.6) | 1502(83.9) | 1071(78.6) | 100(81.3) | 330(74.2) | 641(80.7) |        |                    |        |        |
| <b>Alcohol use</b>       |            |            |            |           |           |           | 0.160  | 0.332              | 0.078  | 0.616  |
| Yes                      | 251(8.0)   | 132(7.4)   | 119(8.7)   | 12(9.8)   | 44(9.9)   | 63(7.9)   |        |                    |        |        |
| No                       | 2897(91.9) | 1659(92.6) | 1243(91.3) | 111(90.2) | 401(90.1) | 731(92.1) |        |                    |        |        |
| <b>Child sex</b>         |            |            |            |           |           |           | <0.001 | <0.001             | <0.001 | <0.001 |
| Male                     | 1588(50.4) | 750(41.9)  | 838(61.5)  | 91(74.0)  | 316(71.0) | 431(54.3) |        |                    |        |        |
| Female                   | 1565(49.6) | 1041(58.1) | 524(38.5)  | 32(26.0)  | 129(29.0) | 363(45.7) |        |                    |        |        |
| <b>LBW</b>               |            |            |            |           |           |           | <0.001 | 0.006              | 0.008  | <0.001 |
| ≤2,500 g                 | 871(27.6)  | 427(23.8)  | 444(32.6)  | 43(35.0)  | 133(29.9) | 268(33.8) |        |                    |        |        |
| >2,500 g                 | 2282(72.4) | 1364(76.2) | 918(67.4)  | 80(65.0)  | 312(70.1) | 526(66.2) |        |                    |        |        |

|                                |              |              |              |              |              |              |        |        |       |        |
|--------------------------------|--------------|--------------|--------------|--------------|--------------|--------------|--------|--------|-------|--------|
| <b>PTB</b>                     |              |              |              |              |              |              | <0.001 | <0.001 | 0.014 | <0.001 |
| Yes                            | 902(28.6)    | 438(24.5)    | 464(34.1)    | 48(39.0)     | 134(30.1)    | 282(35.5)    |        |        |       |        |
| No                             | 2251(71.4)   | 1353(75.5)   | 898(65.9)    | 75(61.0)     | 311(69.9)    | 512(64.5)    |        |        |       |        |
| <b>Soft drink consumption</b>  |              |              |              |              |              |              | 0.803  | 0.094  | 0.032 | 0.575  |
| ≤1 cup per month               | 1390(44.1)   | 793(44.3)    | 597(43.8)    | 64(52.0)     | 172(38.7)    | 361(45.5)    |        |        |       |        |
| >1 cup per month               | 1763(55.9)   | 998(55.7)    | 765(56.2)    | 59(48.0)     | 273(61.3)    | 433(54.5)    |        |        |       |        |
| <b>Folate (nmol/L) ¶</b>       | 31(20-44)    | 30(21-45)    | 30(20-43)    | 33(23-43)    | 29(18-43)    | 31(21-43)    | 0.113  | 0.249  | 0.025 | 0.251  |
| <b>Vitamin B 12 (pmol/L) ¶</b> | 263(214-323) | 262(211-319) | 266(214-329) | 282(232-351) | 264(219-318) | 265(219-334) | 0.091  | 0.054  | 0.760 | 0.113  |

Abbreviations: HS, high school; BMI, body mass index, LBW, low birth weight; PTB, preterm birth; TD, typically developing; NDD, neurodevelopmental disabilities; ADHD, attention-deficit/hyperactivity disorder; other DD, other developmental disabilities. p-values derived using the  $\chi^2$  test, Fisher's exact test, or Kruskal-Wallis test. Percentages may not add to 100% due to rounding.

#: Fisher's Exact test.

\*: Included self-reported identification as African American and Haitian. †: Included self-reported identification as Asian, Cape Verdean, Pacific Islander, More than one race and ethnicity, and Other race and ethnicity.

¶: Included 2068 mothers.

**Table S4.** Adjusted associations of maternal Mediterranean-style diet score (MSDS) with offspring Autism, ADHD, and other DD among women with OWO/DM.

| Characteristics                 |        | TD  |    | Autism             |          | ADHD |                    | other DD |     |                    |          |
|---------------------------------|--------|-----|----|--------------------|----------|------|--------------------|----------|-----|--------------------|----------|
|                                 |        | n   | n  | OR (95%CI)         | <i>p</i> | n    | OR (95%CI)         | <i>p</i> | n   | OR (95%CI)         | <i>p</i> |
| <b>MSDS (per 1 SD increase)</b> |        |     |    |                    |          |      |                    |          |     |                    |          |
| Model A#                        |        | 974 | 77 | 0.758(0.589-0.976) | 0.032    | 265  | 0.934(0.810-1.077) | 0.347    | 476 | 0.936(0.835-1.050) | 0.260    |
| Model B¶                        |        | 612 | 53 | 0.658(0.472-0.913) | 0.013    | 185  | 0.866(0.718-1.042) | 0.127    | 330 | 0.876(0.757-1.012) | 0.072    |
| <b>MSDS quintiles</b>           |        |     |    |                    |          |      |                    |          |     |                    |          |
| Model A#                        | Q1     | 192 | 23 | Ref                |          | 62   | Ref                |          | 101 | Ref                |          |
|                                 | Q2     | 220 | 20 | 0.661(0.332-1.305) | 0.233    | 67   | 0.986(0.647-1.504) | 0.947    | 108 | 0.966(0.684-1.365) | 0.844    |
|                                 | Q3     | 230 | 13 | 0.347(0.158-0.731) | 0.006    | 47   | 0.653(0.415-1.021) | 0.063    | 111 | 0.891(0.631-1.260) | 0.515    |
|                                 | Q4     | 156 | 12 | 0.702(0.312-1.516) | 0.377    | 54   | 1.277(0.811-2.011) | 0.291    | 80  | 1.033(0.708-1.504) | 0.867    |
|                                 | Q5     | 176 | 9  | 0.422(0.172-0.963) | 0.047    | 35   | 0.766(0.465-1.249) | 0.289    | 76  | 0.838(0.573-1.224) | 0.361    |
|                                 | Q3-Q5* | 562 | 34 | 0.451(0.247-0.832) | 0.01     | 136  | 0.848(0.589-1.231) | 0.381    | 267 | 0.914(0.681-1.233) | 0.554    |
| Model B¶                        | Q1     | 99  | 14 | Ref                |          | 42   | Ref                |          | 69  | Ref                |          |
|                                 | Q2     | 140 | 15 | 0.652(0.279-1.524) | 0.319    | 48   | 0.804(0.473-1.367) | 0.419    | 72  | 0.748(0.482-1.160) | 0.195    |
|                                 | Q3     | 152 | 12 | 0.314(0.124-0.773) | 0.012    | 34   | 0.473(0.269-0.825) | 0.009    | 81  | 0.699(0.454-1.076) | 0.104    |
|                                 | Q4     | 104 | 7  | 0.403(0.135-1.108) | 0.087    | 39   | 1.102(0.625-1.943) | 0.737    | 57  | 0.819(0.512-1.307) | 0.403    |



|        |     |    |                    |       |    |                    |       |     |                    |       |
|--------|-----|----|--------------------|-------|----|--------------------|-------|-----|--------------------|-------|
| Q5     | 117 | 5  | 0.265(0.079-0.773) | 0.020 | 22 | 0.537(0.283-1.001) | 0.053 | 51  | 0.632(0.392-1.013) | 0.058 |
| Q3-Q5* | 373 | 24 | 0.321(0.149-0.706) | 0.004 | 95 | 0.643(0.405-1.030) | 0.063 | 189 | 0.712(0.489-1.038) | 0.076 |

Abbreviations: OWO, overweight/obese; DM, diabetes mellitus.

\*: Combined group includes those in quintiles 3, 4, and 5.

#: Controlled for MSDS (continuous or categorical), race and ethnicity, education, maternal age, parity, marriage status, pre-pregnancy BMI, DM, preeclampsia, smoking and alcohol consumption anytime from six months before pregnancy to delivery, soft drink consumption, child sex, low birthweight, and preterm birth.

¶: Additionally controlled for plasma folate and vitamin B12 levels.

**Table S5.** Adjusted associations of maternal Mediterranean-style diet score (MSDS) with offspring Autism, ADHD, and other DD among women without OWO or DM.

| Characteristics                 |        | TD  |    | Autism              |          | ADHD |                    | other DD |     |                    |          |
|---------------------------------|--------|-----|----|---------------------|----------|------|--------------------|----------|-----|--------------------|----------|
|                                 |        | n   | n  | OR (95%CI)          | <i>p</i> | n    | OR (95%CI)         | <i>p</i> | n   | OR (95%CI)         | <i>p</i> |
| <b>MSDS (per 1 SD increase)</b> |        |     |    |                     |          |      |                    |          |     |                    |          |
| Model A#                        |        | 817 | 46 | 1.254(0.884-1.795)  | 0.209    | 180  | 1.112(0.926-1.339) | 0.259    | 318 | 0.881(0.763-1.016) | 0.082    |
| Model B¶                        |        | 529 | 20 | 1.293(0.826-2.048)  | 0.266    | 115  | 1.093(0.863-1.389) | 0.464    | 206 | 0.900(0.751-1.077) | 0.249    |
| <b>MSDS quintiles</b>           |        |     |    |                     |          |      |                    |          |     |                    |          |
| Model A#                        | Q1     | 147 | 5  | Ref                 |          | 31   | Ref                |          | 76  | Ref                |          |
|                                 | Q2     | 204 | 11 | 1.531(0.515-5.181)  | 0.46     | 52   | 1.478(0.880-2.519) | 0.144    | 78  | 0.725(0.488-1.075) | 0.109    |
|                                 | Q3     | 185 | 12 | 1.609(0.546-5.425)  | 0.408    | 39   | 1.192(0.685-2.090) | 0.535    | 59  | 0.618(0.405-0.941) | 0.025    |
|                                 | Q4     | 137 | 8  | 1.721(0.528-6.145)  | 0.376    | 26   | 1.137(0.614-2.098) | 0.681    | 56  | 0.793(0.512-1.224) | 0.296    |
|                                 | Q5     | 144 | 10 | 1.756(0.558-6.190)  | 0.350    | 32   | 1.602(0.883-2.921) | 0.122    | 49  | 0.656(0.415-1.030) | 0.068    |
|                                 | Q3-Q5* | 466 | 30 | 1.682(0.654-5.250)  | 0.318    | 97   | 1.279(0.797-2.096) | 0.317    | 164 | 0.682(0.481-0.970) | 0.032    |
| Model B¶                        | Q1     | 96  | 3  | Ref                 |          | 20   | Ref                |          | 46  | Ref                |          |
|                                 | Q2     | 132 | 10 | 2.411(0.630-12.189) | 0.231    | 33   | 1.526(0.786-3.027) | 0.217    | 52  | 0.821(0.497-1.358) | 0.442    |
|                                 | Q3     | 115 | 9  | 2.151(0.527-11.393) | 0.316    | 26   | 1.164(0.580-2.369) | 0.67     | 40  | 0.699(0.410-1.186) | 0.185    |

|        |     |    |                     |       |    |                    |       |     |                    |       |
|--------|-----|----|---------------------|-------|----|--------------------|-------|-----|--------------------|-------|
| Q4     | 97  | 5  | 1.715(0.361-9.640)  | 0.507 | 14 | 0.854(0.378-1.896) | 0.699 | 37  | 0.785(0.453-1.355) | 0.386 |
| Q5     | 89  | 6  | 2.550(0.547-14.562) | 0.251 | 22 | 1.751(0.830-3.734) | 0.143 | 31  | 0.713(0.399-1.264) | 0.250 |
| Q3-Q5* | 301 | 20 | 2.084(0.597-10.116) | 0.296 | 62 | 1.205(0.663-2.260) | 0.55  | 108 | 0.731(0.470-1.143) | 0.166 |

\*: Combined group includes those in quintiles 3, 4, and 5.

#: Controlled for MSDS (continuous or categorical), race and ethnicity, education, maternal age, parity, marriage status, pre-pregnancy BMI, DM, preeclampsia, smoking and alcohol consumption anytime from six months before pregnancy to delivery, soft drink consumption, child sex, low birthweight, and preterm birth.

¶: Additionally controlled for plasma folate and vitamin B12 levels.

**Table S6.** Unadjusted and adjusted associations of maternal MSDS with NDD, Autism, ADHD, and other DD in offspring. <sup>a</sup>

| Characteristics                 | TD     |      | NDD                |                    | Autism |                    | ADHD               |       | other DD           |                    |       |                    |                    |       |
|---------------------------------|--------|------|--------------------|--------------------|--------|--------------------|--------------------|-------|--------------------|--------------------|-------|--------------------|--------------------|-------|
|                                 | n      | n    | OR (95%CI)         | p                  | n      | OR (95%CI)         | p                  | n     | OR (95%CI)         | p                  |       |                    |                    |       |
| <b>MSDS (per 1 SD increase)</b> |        |      |                    |                    |        |                    |                    |       |                    |                    |       |                    |                    |       |
| Unadjusted                      | 1783   | 1351 | 0.923(0.859-0.990) | 0.026              | 121    | 0.938(0.781-1.129) | 0.497              | 440   | 0.928(0.836-1.029) | 0.156              | 790   | 0.918(0.844-0.998) | 0.044              |       |
| Model A#                        | 1783   | 1351 | 0.943(0.874-1.017) | 0.127              | 121    | 0.941(0.768-1.155) | 0.561              | 440   | 1.007(0.900-1.128) | 0.897              | 790   | 0.919(0.841-1.004) | 0.062              |       |
| Model B¶                        | 1140   | 916  | 0.910(0.826-1.001) | 0.053              | 84     | 0.907(0.700-1.177) | 0.460              | 299   | 0.948(0.822-1.094) | 0.468              | 533   | 0.900(0.805-1.005) | 0.062              |       |
| <b>MSDS quintiles</b>           |        |      |                    |                    |        |                    |                    |       |                    |                    |       |                    |                    |       |
| Unadjusted                      | Q1     | 336  | 292                | Ref                | 27     | Ref                | 90                 | Ref   | 175                | Ref                |       |                    |                    |       |
|                                 | Q2     | 424  | 336                | 0.901(0.730-1.114) | 0.336  | 31                 | 0.885(0.520-1.512) | 0.652 | 119                | 1.023(0.754-1.392) | 0.884 | 186                | 0.840(0.654-1.079) | 0.173 |
|                                 | Q3     | 415  | 281                | 0.770(0.620-0.957) | 0.019  | 25                 | 0.729(0.415-1.275) | 0.268 | 86                 | 0.755(0.545-1.047) | 0.092 | 170                | 0.785(0.608-1.012) | 0.062 |
|                                 | Q4     | 293  | 236                | 0.916(0.727-1.155) | 0.459  | 20                 | 0.826(0.450-1.490) | 0.530 | 80                 | 0.995(0.709-1.394) | 0.978 | 136                | 0.889(0.676-1.167) | 0.398 |
|                                 | Q5     | 315  | 206                | 0.750(0.594-0.947) | 0.016  | 18                 | 0.719(0.388-1.304) | 0.283 | 65                 | 0.763(0.537-1.080) | 0.129 | 123                | 0.748(0.567-0.984) | 0.039 |
|                                 | Q3-Q5* | 1023 | 723                | 0.806(0.671-0.967) | 0.020  | 63                 | 0.754(0.480-1.211) | 0.229 | 231                | 0.826(0.632-1.086) | 0.166 | 429                | 0.803(0.649-0.995) | 0.044 |
| Model A#                        | Q1     | 336  | 292                | Ref                | 27     | Ref                | 90                 | Ref   | 175                | Ref                |       |                    |                    |       |
|                                 | Q2     | 424  | 336                | 0.952(0.763-1.188) | 0.664  | 31                 | 0.842(0.480-1.482) | 0.547 | 119                | 1.156(0.836-1.601) | 0.382 | 186                | 0.859(0.663-1.113) | 0.249 |
|                                 | Q3     | 415  | 281                | 0.799(0.636-1.004) | 0.054  | 25                 | 0.650(0.358-1.172) | 0.152 | 86                 | 0.842(0.596-1.190) | 0.330 | 170                | 0.776(0.595-1.011) | 0.061 |

|          |        |      |     |                    |       |    |                    |       |     |                    |       |     |                    |       |
|----------|--------|------|-----|--------------------|-------|----|--------------------|-------|-----|--------------------|-------|-----|--------------------|-------|
|          | Q4     | 293  | 236 | 0.995(0.779-1.271) | 0.969 | 20 | 0.892(0.469-1.671) | 0.722 | 80  | 1.232(0.858-1.769) | 0.258 | 136 | 0.934(0.703-1.240) | 0.637 |
|          | Q5     | 315  | 206 | 0.818(0.638-1.048) | 0.112 | 18 | 0.724(0.374-1.375) | 0.327 | 65  | 1.022(0.701-1.487) | 0.909 | 123 | 0.765(0.572-1.021) | 0.070 |
|          | Q3-Q5* | 1023 | 723 | 0.860(0.708-1.044) | 0.127 | 63 | 0.734(0.451-1.220) | 0.221 | 231 | 1.000(0.750-1.341) | 0.999 | 429 | 0.817(0.653-1.025) | 0.079 |
| Model B¶ | Q1     | 194  | 192 | Ref                |       | 16 | Ref                |       | 62  | Ref                |       | 114 | Ref                |       |
|          | Q2     | 272  | 230 | 0.894(0.676-1.181) | 0.430 | 25 | 0.961(0.488-1.932) | 0.910 | 81  | 1.012(0.676-1.520) | 0.953 | 124 | 0.795(0.574-1.102) | 0.168 |
|          | Q3     | 272  | 202 | 0.739(0.556-0.982) | 0.037 | 21 | 0.702(0.344-1.446) | 0.331 | 60  | 0.690(0.449-1.057) | 0.088 | 121 | 0.721(0.518-1.003) | 0.052 |
|          | Q4     | 201  | 159 | 0.863(0.636-1.170) | 0.343 | 12 | 0.668(0.289-1.500) | 0.333 | 53  | 1.038(0.661-1.629) | 0.872 | 94  | 0.842(0.592-1.195) | 0.336 |
|          | Q5     | 201  | 133 | 0.720(0.527-0.983) | 0.039 | 10 | 0.608(0.255-1.398) | 0.247 | 43  | 0.856(0.534-1.364) | 0.514 | 80  | 0.682(0.474-0.978) | 0.038 |
|          | Q3-Q5* | 674  | 494 | 0.769(0.602-0.983) | 0.036 | 43 | 0.668(0.361-1.280) | 0.209 | 156 | 0.828(0.578-1.194) | 0.306 | 295 | 0.745(0.562-0.989) | 0.041 |

<sup>a</sup>: In this sensitivity analysis, women with MSDSs lower than 12 or higher than 35 were removed.

\*: Combined group includes those in quintiles 3, 4, and 5.

#: Controlled for MSDS (continuous or categorical), race and ethnicity, education, maternal age, parity, marriage status, pre-pregnancy BMI, DM, preeclampsia, smoking and alcohol consumption anytime from six months before pregnancy to delivery, soft drink consumption, child sex, low birthweight, and preterm birth.

¶: Additionally controlled for plasma folate and vitamin B12 levels.

**Table S7.** Adjusted associations between maternal MSDS and NDD in offspring stratified by maternal smoking prior to and during pregnancy. <sup>b</sup>

| Characteristics                 |        | Ever smoked |     |                    |          | Never smoked |      |                    |          |
|---------------------------------|--------|-------------|-----|--------------------|----------|--------------|------|--------------------|----------|
|                                 |        | TD          |     | NDD                |          | TD           |      | NDD                |          |
|                                 |        | n           | n   | OR (95%CI)         | <i>p</i> | n            | n    | OR (95%CI)         | <i>p</i> |
| <b>MSDS (per 1 SD increase)</b> |        |             |     |                    |          |              |      |                    |          |
| Model A #                       |        | 289         | 291 | 0.999(0.840-1.188) | 0.989    | 1502         | 1071 | 0.926(0.851-1.008) | 0.075    |
| Model B ¶                       |        | 163         | 193 | 0.938(0.743-1.183) | 0.588    | 983          | 1086 | 0.899(0.808-0.999) | 0.049    |
| <b>MSDS quintiles</b>           |        |             |     |                    |          |              |      |                    |          |
| Model A #                       | Q1     | 97          | 100 | Ref                |          | 242          | 198  | Ref                |          |
|                                 | Q2     | 78          | 68  | 0.921(0.582-1.457) | 0.726    | 346          | 268  | 0.932(0.722-1.204) | 0.591    |
|                                 | Q3     | 57          | 56  | 1.032(0.628-1.698) | 0.901    | 358          | 225  | 0.747(0.575-0.970) | 0.029    |
|                                 | Q4     | 30          | 40  | 1.471(0.819-2.667) | 0.199    | 263          | 196  | 0.920(0.698-1.211) | 0.550    |
|                                 | Q5     | 27          | 27  | 0.976(0.508-1.877) | 0.943    | 293          | 184  | 0.774(0.587-1.019) | 0.068    |
|                                 | Q3-Q5* | 114         | 123 | 1.132(0.752-1.706) | 0.553    | 914          | 605  | 0.804(0.643-1.007) | 0.057    |
| Model B ¶                       | Q1     | 47          | 63  | Ref                |          | 148          | 131  | Ref                |          |
|                                 | Q2     | 49          | 47  | 0.792(0.439-1.428) | 0.439    | 223          | 183  | 0.902(0.655-1.244) | 0.530    |
|                                 | Q3     | 31          | 42  | 0.915(0.481-1.739) | 0.785    | 241          | 160  | 0.689(0.498-0.952) | 0.024    |

|        |    |    |                    |       |     |     |                    |       |
|--------|----|----|--------------------|-------|-----|-----|--------------------|-------|
| Q4     | 20 | 24 | 0.969(0.458-2.061) | 0.934 | 181 | 135 | 0.843(0.599-1.186) | 0.327 |
| Q5     | 16 | 17 | 0.778(0.335-1.806) | 0.557 | 190 | 120 | 0.699(0.495-0.985) | 0.041 |
| Q3-Q5* | 67 | 83 | 0.898(0.527-1.526) | 0.691 | 612 | 415 | 0.736(0.556-0.975) | 0.032 |

<sup>b</sup>: smoking time period was defined as anytime from six months before pregnancy to delivery

\*: Combined group includes those in quintiles 3, 4, and 5.

#: Controlled for race and ethnicity, education, maternal age, parity, marriage status, pre-pregnancy BMI, DM, preeclampsia, alcohol consumption anytime from six months before pregnancy to delivery, soft drink consumption, MSDS (continuous or categorical), child sex, LBW, and PTB.

¶: Additionally controlled for plasma folate and vitamin B12 levels.

†: Based on model B, treating maternal smoking as a binary variable (ever smoked or never smoked anytime from six months before pregnancy) and Mediterranean diet score as either a categorical or continuous variable.

**Table S8.** Adjusted associations between maternal MSDS and NDD in offspring stratified by preterm birth (PTB).

| Characteristics                 | PTB    |     |                    |                    | Non-PTB |     |                    |                    |       |
|---------------------------------|--------|-----|--------------------|--------------------|---------|-----|--------------------|--------------------|-------|
|                                 | TD     |     | NDD                |                    | TD      |     | NDD                |                    |       |
|                                 | n      | n   | OR (95% CI)        | <i>p</i>           | n       | n   | OR (95% CI)        | <i>p</i>           |       |
| <b>MSDS (per 1 SD increase)</b> |        |     |                    |                    |         |     |                    |                    |       |
| Model A #                       | 438    | 464 | 0.983(0.848-1.139) | 0.820              | 1353    | 898 | 0.916(0.838-1.001) | 0.053              |       |
| Model B ¶                       | 249    | 285 | 0.937(0.767-1.143) | 0.519              | 897     | 637 | 0.886(0.793-0.990) | 0.032              |       |
| <b>MSDS quintiles</b>           |        |     |                    |                    |         |     |                    |                    |       |
| Model A #                       | Q1     | 86  | 97                 | Ref                | 253     | 201 | Ref                |                    |       |
|                                 | Q2     | 113 | 126                | 1.186(0.787-1.789) | 0.414   | 311 | 210                | 0.866(0.664-1.128) | 0.285 |
|                                 | Q3     | 115 | 89                 | 0.735(0.476-1.133) | 0.163   | 300 | 192                | 0.821(0.626-1.075) | 0.151 |
|                                 | Q4     | 57  | 81                 | 1.450(0.896-2.354) | 0.131   | 236 | 155                | 0.863(0.647-1.150) | 0.314 |
|                                 | Q5     | 67  | 71                 | 1.023(0.637-1.642) | 0.926   | 253 | 140                | 0.723(0.538-0.970) | 0.031 |
|                                 | Q3-Q5* | 239 | 241                | 0.979(0.675-1.420) | 0.910   | 789 | 487                | 0.804(0.640-1.012) | 0.063 |
| Model B ¶                       | Q1     | 43  | 58                 | Ref                | 152     | 136 | Ref                |                    |       |
|                                 | Q2     | 63  | 79                 | 0.991(0.568-1.729) | 0.976   | 209 | 151                | 0.866(0.624-1.200) | 0.387 |
|                                 | Q3     | 74  | 60                 | 0.553(0.309-0.980) | 0.044   | 198 | 142                | 0.806(0.579-1.122) | 0.201 |



|        |     |     |                    |       |     |     |                    |       |
|--------|-----|-----|--------------------|-------|-----|-----|--------------------|-------|
| Q4     | 31  | 46  | 1.108(0.571-2.164) | 0.762 | 170 | 113 | 0.776(0.547-1.099) | 0.154 |
| Q5     | 38  | 42  | 0.825(0.433-1.571) | 0.558 | 168 | 95  | 0.668(0.465-0.958) | 0.029 |
| Q3-Q5* | 143 | 148 | 0.736(0.442-1.221) | 0.237 | 536 | 350 | 0.756(0.570-1.004) | 0.053 |

\*: Combined group includes those in quintiles 3, 4, and 5.

#: Controlled for race and ethnicity, education, maternal age, parity, marriage status, pre-pregnancy BMI, DM, preeclampsia, smoking and alcohol consumption anytime from six months before pregnancy to delivery, soft drink consumption, MSDS (continuous or categorical), child sex, and LBW.

¶: Additionally controlled for plasma folate and vitamin B12 levels.

**Table S9.** Adjusted associations between maternal MSDS and NDD in offspring stratified by low birthweight (LBW).

| Characteristics                 | LBW    |     |                    |                    | Non-LBW |     |                    |                    |       |
|---------------------------------|--------|-----|--------------------|--------------------|---------|-----|--------------------|--------------------|-------|
|                                 | TD     |     | NDD                |                    | TD      |     | NDD                |                    |       |
|                                 | n      | n   | OR (95%CI)         | <i>p</i>           | n       | n   | OR (95%CI)         | <i>p</i>           |       |
| <b>MSDS (per 1 SD increase)</b> |        |     |                    |                    |         |     |                    |                    |       |
| Model A #                       | 427    | 444 | 0.942(0.812-1.093) | 0.432              | 1364    | 918 | 0.927(0.848-1.012) | 0.092              |       |
| Model B ¶                       | 232    | 268 | 0.969(0.788-1.191) | 0.765              | 914     | 654 | 0.879(0.787-0.981) | 0.022              |       |
| <b>MSDS quintiles</b>           |        |     |                    |                    |         |     |                    |                    |       |
| Model A #                       | Q1     | 94  | 102                | Ref                |         | 245 | 196                | Ref                |       |
|                                 | Q2     | 114 | 121                | 1.081(0.721-1.623) | 0.705   | 310 | 215                | 0.891(0.683-1.163) | 0.396 |
|                                 | Q3     | 108 | 84                 | 0.675(0.438-1.038) | 0.074   | 307 | 197                | 0.828(0.632-1.085) | 0.172 |
|                                 | Q4     | 55  | 73                 | 1.239(0.765-2.011) | 0.385   | 238 | 163                | 0.909(0.682-1.211) | 0.516 |
|                                 | Q5     | 56  | 64                 | 0.974(0.596-1.593) | 0.915   | 264 | 147                | 0.739(0.551-0.988) | 0.042 |
|                                 | Q3-Q5* | 219 | 221                | 0.887(0.614-1.282) | 0.525   | 809 | 507                | 0.825(0.655-1.039) | 0.101 |
| Model B ¶                       | Q1     | 46  | 57                 | Ref                |         | 149 | 137                | Ref                |       |
|                                 | Q2     | 65  | 75                 | 1.032(0.595-1.789) | 0.911   | 207 | 155                | 0.855(0.616-1.186) | 0.348 |
|                                 | Q3     | 65  | 54                 | 0.555(0.308-0.991) | 0.048   | 207 | 148                | 0.789(0.568-1.097) | 0.159 |

|        |     |     |                    |       |     |     |                    |       |
|--------|-----|-----|--------------------|-------|-----|-----|--------------------|-------|
| Q4     | 28  | 46  | 1.281(0.661-2.506) | 0.465 | 173 | 113 | 0.755(0.531-1.072) | 0.116 |
| Q5     | 28  | 36  | 0.912(0.458-1.821) | 0.794 | 178 | 101 | 0.661(0.455-0.929) | 0.018 |
| Q3-Q5* | 121 | 136 | 0.795(0.477-1.319) | 0.376 | 558 | 362 | 0.737(0.555-0.979) | 0.035 |

\*: Combined group includes those in quintiles 3, 4, and 5.

#: Controlled for race and ethnicity, education, maternal age, parity, marriage status, pre-pregnancy BMI, DM, preeclampsia, smoking and alcohol consumption anytime from six months before pregnancy to delivery, soft drink consumption, MSDS (continuous or categorical), low birthweight, and PTB.

¶: Additionally controlled for plasma folate and vitamin B12 levels.

Table S10. Interaction effects of MSDS and maternal age on Autism and other DD

| Characteristics                 | TD       |     | Autism                                   | n     | other DD                                 |       |       |
|---------------------------------|----------|-----|------------------------------------------|-------|------------------------------------------|-------|-------|
|                                 | n        | n   | <i>p</i> (MSDS-maternal age interaction) |       | <i>p</i> (MSDS-maternal age interaction) |       |       |
| <b>MSDS (per 1 SD increase)</b> |          |     |                                          |       |                                          |       |       |
| Model A#                        | 1783     | 121 | 0.732                                    | 790   | 0.142                                    |       |       |
| Model B¶                        | 1140     | 84  | 0.896                                    | 533   | 0.964                                    |       |       |
| <b>MSDS quintiles</b>           |          |     |                                          |       |                                          |       |       |
| Model A#                        | Q1       | 336 | 27                                       | Ref   | 175                                      | Ref   |       |
|                                 | Q2       | 424 | 31                                       | 0.506 | 186                                      | 0.741 |       |
|                                 | Q3       | 415 | 25                                       | 0.479 | 170                                      | 0.549 |       |
|                                 | Q4       | 293 | 20                                       | 0.888 | 136                                      | 0.198 |       |
|                                 | Q5       | 315 | 18                                       | 0.636 | 123                                      | 0.370 |       |
|                                 | Model B¶ | Q1  | 194                                      | 16    | Ref                                      | 114   | Ref   |
|                                 |          | Q2  | 272                                      | 25    | 0.925                                    | 124   | 0.555 |
|                                 |          | Q3  | 272                                      | 21    | 0.739                                    | 121   | 0.878 |
|                                 |          | Q4  | 201                                      | 12    | 0.135                                    | 94    | 0.806 |
|                                 |          | Q5  | 201                                      | 10    | 0.622                                    | 80    | 0.721 |

#: Controlled for race and ethnicity, education, maternal age, parity, marriage status, pre-pregnancy BMI, DM, preeclampsia, smoking and alcohol consumption anytime from six months before pregnancy to delivery, soft drink consumption, MSDS (continuous or categorical), low birthweight, and PTB.

¶: Additionally controlled for plasma folate and vitamin B12 levels.

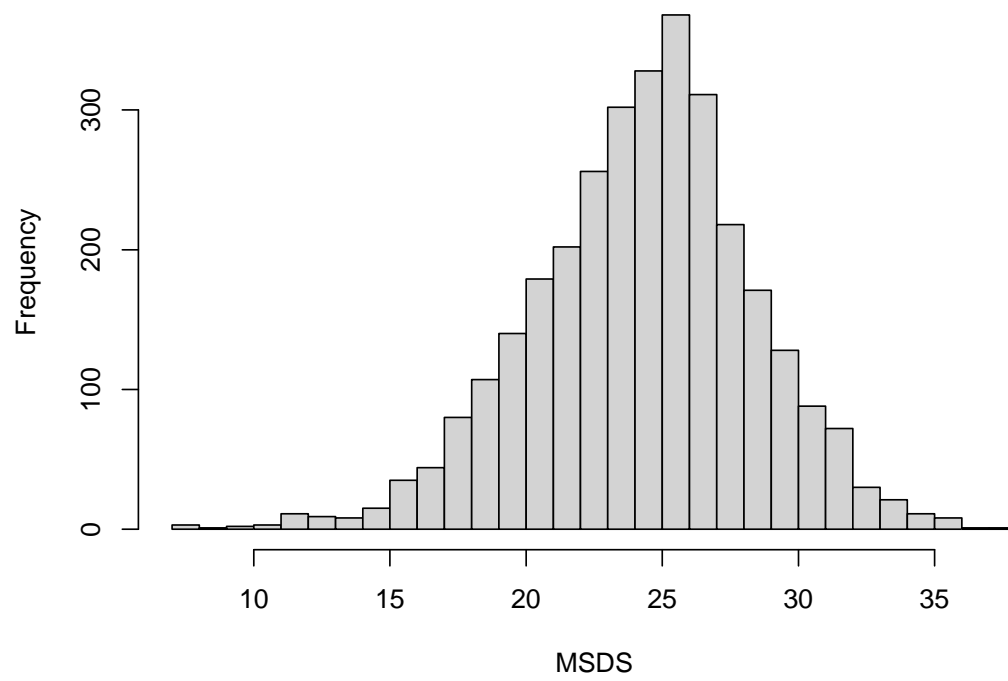

**Figure S1.** The distribution of maternal Mediterranean-style diet scores (MSDSs).

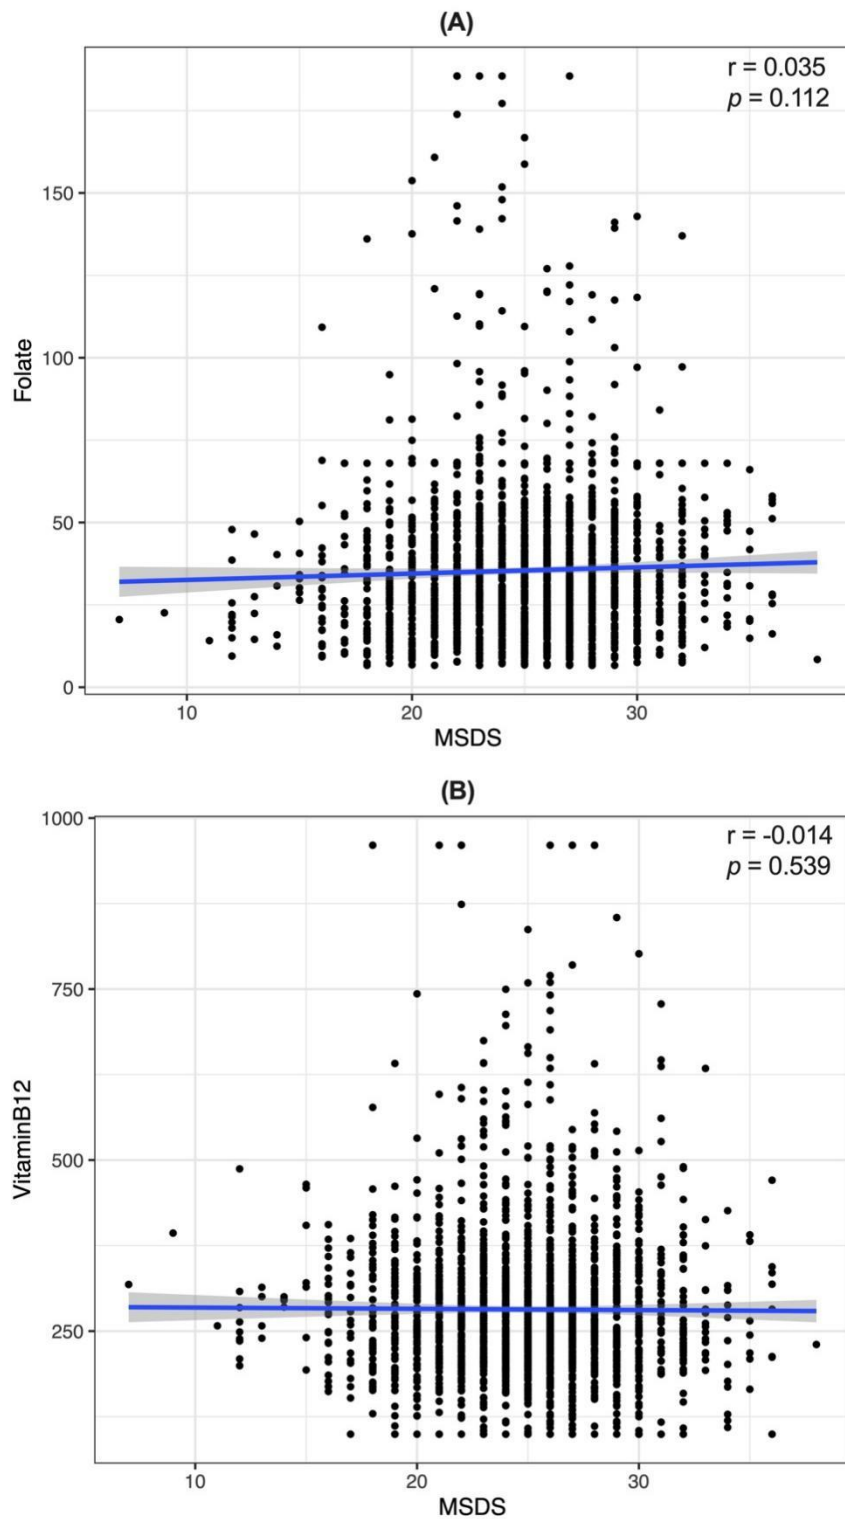

**Figure S2.** A scatter plot of correlation between maternal MSDSs versus maternal plasma folate levels (A), and a scatter plot of correlation between maternal MSDSs versus maternal plasma vitamin B12 levels (B).
